# Supplementary material
Source: PubMed Central journal article supplement (PMC7239754)
Supplement: NIHMS1578098-supplement-2.pdf [file NIHMS1578098-supplement-2.pdf]

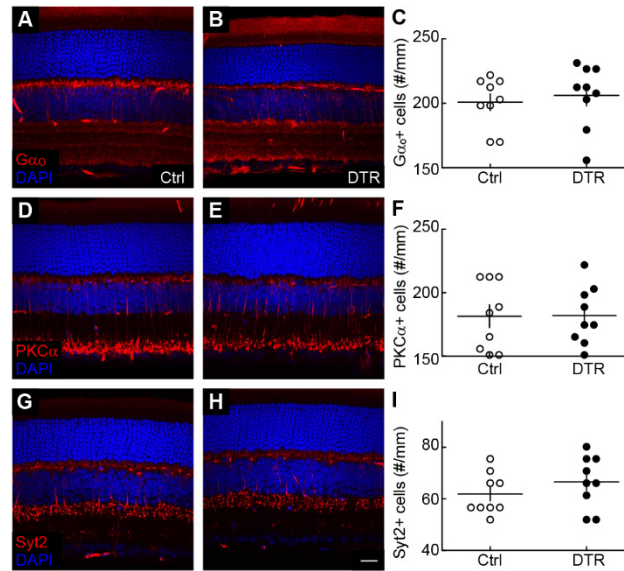

**Figure S1. Stable bipolar cell numbers after cone degeneration. Related to Figure 1.**

(A, B, D, E, G, H) Representative images of vertical slices from control (A, D, G) and *Cone-DTR* (B, E, H) retinas 30 days after DT injection at P10 stained for Gao (A, B), PKC $\alpha$  (D, E) and Syt2 (G, H) (red) and DAPI (blue). Scale bar = 20  $\mu\text{m}$ .

(C, F, I) Summary data for Gao+ ON-bipolar cells number (C, control, open,  $200.89 \pm 6.49 \text{ mm}^{-1}$ , 9 slices from 3 mice, *Cone-DTR*, filled,  $206.13 \pm 8.18 \text{ mm}^{-1}$ , 9 slices from 3 mice,  $p = 0.424$  by Mann–Whitney  $U$  test), PKC $\alpha$ + rod bipolar cells number (F, control, open,  $180.32 \pm 8.91 \text{ mm}^{-1}$ , 9 slices from 3 mice, *Cone-DTR*, filled,  $180.80 \pm 7.59 \text{ mm}^{-1}$ , 9 slices from 3 mice,  $p = 0.894$  by Mann–Whitney  $U$  test), and Syt2+ type 2 bipolar cells number (I, control, open,  $61.89 \pm 2.66 \text{ mm}^{-1}$ , 9 slices from 3 mice, *Cone-DTR*, filled,  $66.61 \pm 3.38 \text{ mm}^{-1}$ , 9 slices from 3 mice,  $p = 0.324$  by Mann–Whitney  $U$  test).

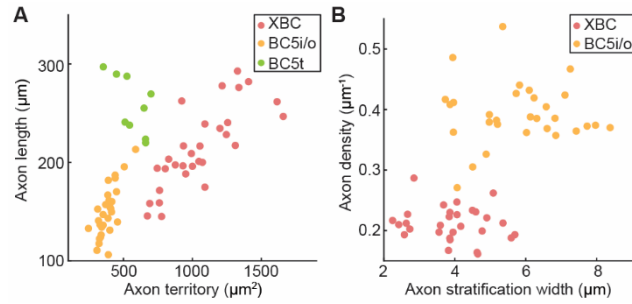

**Figure S2. Morphologic distinction of BC5t, BC5i/o, and XBC. Related to Figure 2.**

(A) Scatter plots of BC5t, BC5i/o, and XBC axon length vs. territories. Because BC5t axons are bistratified, the sum of their branch lengths (i.e., axon length) is greater than that of BC5i/o cells.

(B) Scatter plots of BC5i/o and XBC axon density (i.e., length / territory) vs. axon stratification width.

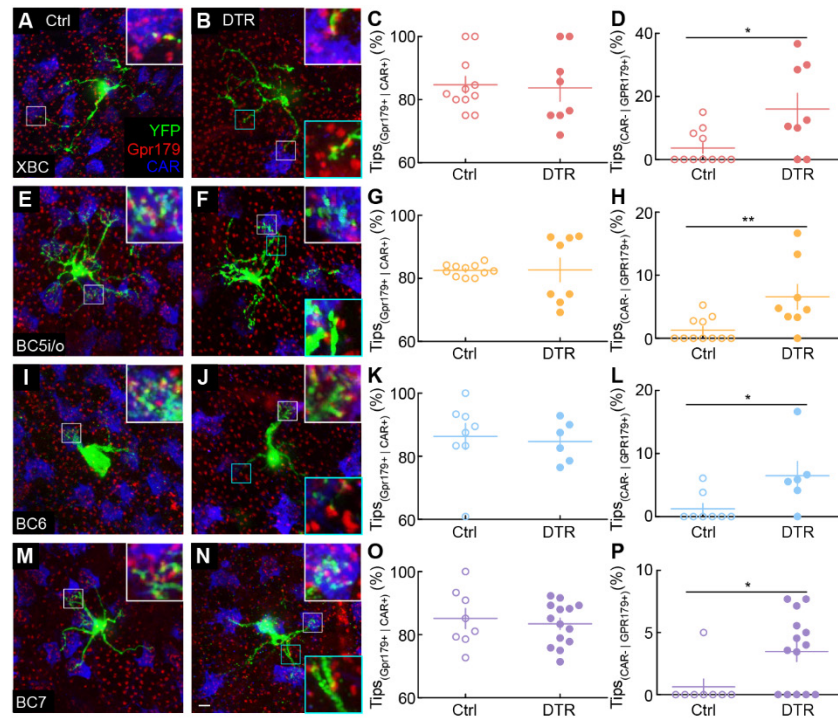

**Figure S3. Synaptic differentiation and rewiring of bipolar cell dendrites after cone degeneration in young retinas. Related to Figure 3.**

(A, B, E, F, I, J, M, N) Representative super-resolution images of maximum intensity projections for dendrites (green) of XBC (A, B), BC5i/o (E, F), BC6 (I, J), and BC7 (M, N) in control (A, E, I, M) and *Cone-DTR* (B, F, J, N) retinas 30 days after DT injection at P10 stained for Gpr179 (red) and cone arrestin (CAR, blue). Scale bar = 5  $\mu$ m. Insets show higher magnification views of colocalization between dendrite tips and Gpr179 within (white boxes) and outside of (cyan boxes) cone pedicles.

(C, D) Summary data for synaptic differentiation (percentage of dendritic tips colocalized with Gpr179 in cone pedicles, C, control,  $84.72\% \pm 2.63\%$ , *Cone-DTR*,  $83.73\% \pm 4.20\%$ ,  $p = 0.78$  by Mann–Whitney U test) and putative rod inputs (percentage of dendritic tips colocalized with Gpr179 outside of cone pedicles, D, control,  $3.64\% \pm 1.63\%$ , *Cone-DTR*,  $16.02\% \pm 4.95\%$ ,  $p = 0.026$  by Mann–Whitney U test) in control (open,  $n = 11$  cells from 3 mice) and *Cone-DTR* (filled,  $n = 8$  cells from 3 mice) XBCs.

(G, H) Summary data for synaptic differentiation (G, control,  $82.54\% \pm 0.56\%$ , *Cone-DTR*,  $85.68\% \pm 3.76\%$ ,  $p = 0.97$  by Mann–Whitney U test) and putative rod inputs (H, control,  $1.28\% \pm 0.57\%$ , *Cone-DTR*,  $6.57\% \pm 1.98\%$ ,  $p = 0.008$  by Mann–Whitney U test) in control (open,  $n = 11$  cells from 3 mice) and *Cone-DTR* (filled,  $n = 8$  cells from 3 mice) BC5i/o cells.

(K, L) Summary data for synaptic differentiation (K, control,  $86.30\% \pm 4.12\%$ , *Cone-DTR*,  $84.67\% \pm 2.66\%$ ,  $p = 0.40$  by Mann–Whitney U test) and putative rod inputs (L, control,  $1.24\% \pm 0.84\%$ , *Cone-DTR*,  $6.49\% \pm 2.25\%$ ,  $p = 0.02$  by Mann–Whitney U test) in control (open,  $n = 8$  cells from 3 mice) and *Cone-DTR* (filled,  $n = 6$  cells from 3 mice) BC6 cells.

(O, P) Summary data for synaptic differentiation (O, control,  $85.14\% \pm 3.19\%$ , *Cone-DTR*,  $83.44\% \pm 1.80\%$ ,  $p = 0.66$  by Mann–Whitney U test) and putative rod inputs (P, control,  $0.63\% \pm 0.63\%$ , *Cone-DTR*,  $3.47\% \pm 0.80\%$ ,  $p = 0.031$  by Mann–Whitney U test) in control (open,  $n = 14$  cells from 3 mice) and *Cone-DTR* (filled,  $n = 8$  cells from 3 mice) BC7 cells. Throughout this figure, \* indicates  $p < 0.05$  and \*\* indicates  $p < 0.01$ .

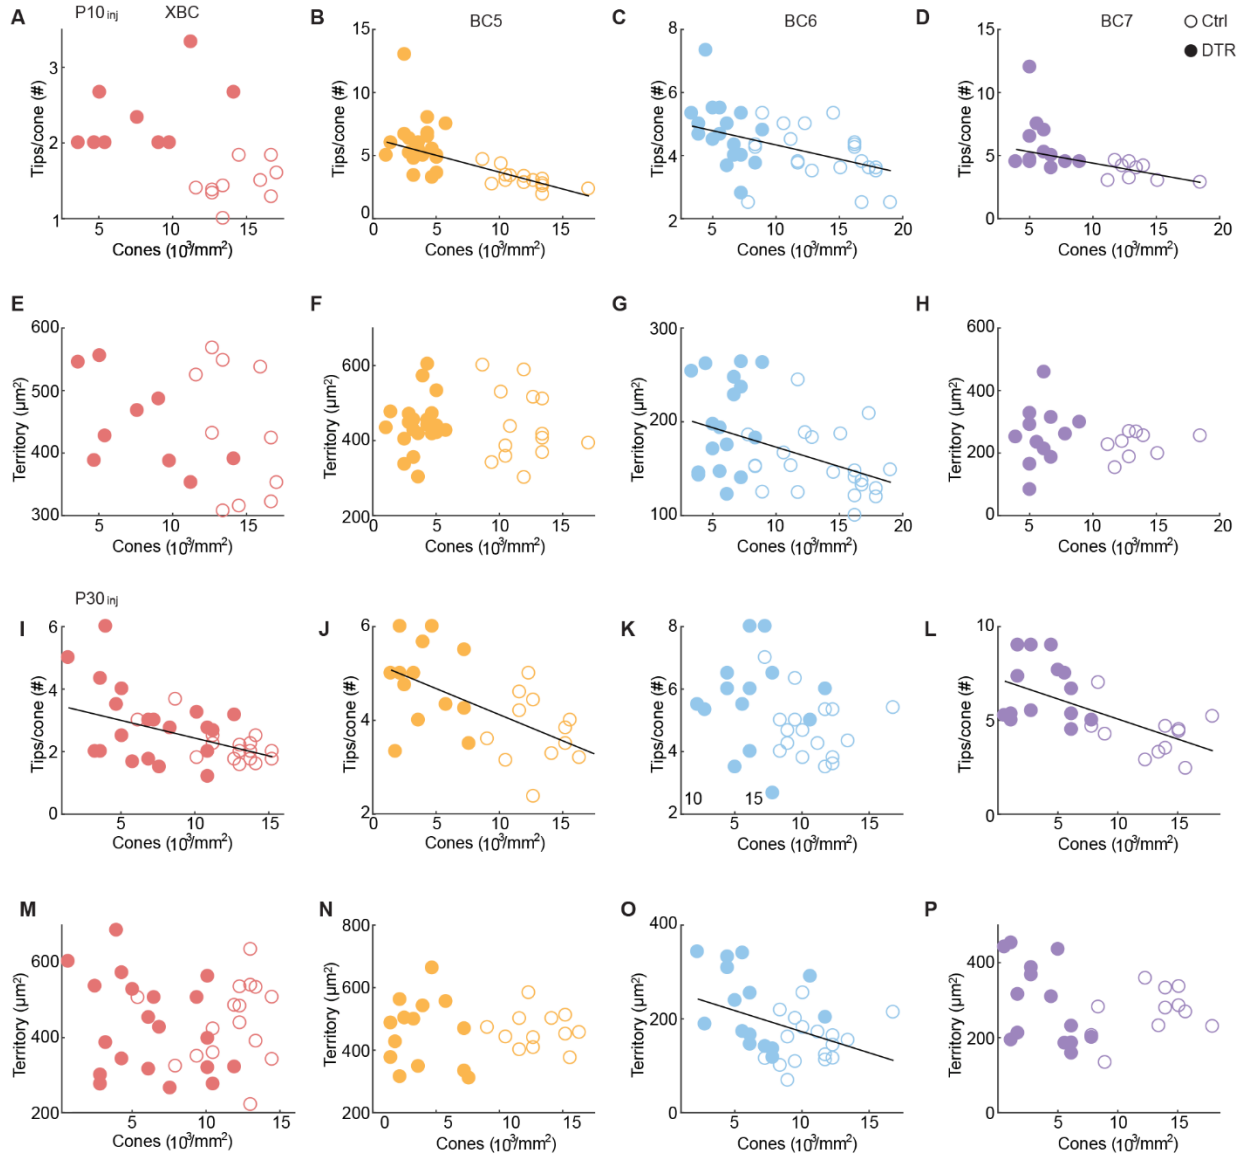

**Figure S4. Homeostatic rewiring varies gradually with cone loss. Related to Figure 3.**

(A, B) Scatter plots of the numbers of tips per cone vs. cone density nearby (i.e., within a  $2,754 \mu\text{m}^2$  square center on the imaged bipolar cell) for XBC (A, control,  $n = 10$  cells from 3 mice, open, *Cone-DTR*,  $n = 9$  cells from 3 mice, filled,  $r = -0.415$ ,  $p = 0.078$ ) and BC5i/o (B, control,  $n = 14$  cells from 3 mice, open, *Cone-DTR*,  $n = 21$  cells from 4 mice, filled,  $r = -0.668$ ,  $p = 1.14 \times 10^{-5}$ ) at 30 days after DT injection at P10. (C, D) Scatter plots of the numbers of tips per cone vs. cone density nearby (i.e., within a  $1,784 \mu\text{m}^2$  square center on the imaged bipolar cell) for BC6 (C, control,  $n = 22$  cells from 5 mice, open, *Cone-DTR*,  $n = 17$  cells from 5 mice, filled,  $r = -0.492$ ,  $p = 1.5 \times 10^{-4}$ ) and BC7 (D, control,  $n = 9$  cells from 3 mice, open, *Cone-DTR*,  $n = 12$  cells from 3 mice, filled,  $r = -0.575$ ,  $p = 6.4 \times 10^{-4}$ ) at 30 days after DT injection at P10. (E, F) Scatter plots of the dendrite territory vs. cone density nearby (i.e., within a  $2,754 \mu\text{m}^2$  square center on the imaged bipolar cell) for XBC (E, same cells as in A,  $r = -0.345$ ,  $p = 0.148$ ) and BC5i/o (F, same cells as in B,  $r = -0.035$ ,  $p = 0.841$ ) at 30 days after DT injection at P10.

(G, H) Scatter plots of the dendrite territory vs. cone density nearby i.e., within a  $1,784 \mu\text{m}^2$  square center on the imaged bipolar cell) for BC6 (G, same cells as in C,  $r = -0.434$ ,  $p = 0.0058$ ) and BC7 (H, same cells as in D,  $r = -0.092$ ,  $p = 0.691$ ) at 30 days after DT injection at P10.

(I-L) Analogous to (A-D) but for 30 days after DT injection at P30 for XBC (I, control,  $n = 16$  cells from 4 mice, open, *Cone-DTR*,  $n = 20$  cells from 4 mice, filled,  $r = -0.556$ ,  $p = 4 \times 10^{-4}$ ), BC5i/o (J, control,  $n = 13$  cells from 3 mice, open, *Cone-DTR*,  $n = 15$  cells from 3 mice, filled,  $r = -0.610$ ,  $p = 7 \times 10^{-4}$ ), BC6 (K, control,  $n = 17$  cells from 4 mice, open, *Cone-DTR*,  $n = 15$  cells from 4 mice, filled,  $r = -0.295$ ,  $p = 0.101$ ), and BC7 (L, control,  $n = 11$  cells from 3 mice, open, *Cone-DTR*,  $n = 14$  cells from 4 mice, filled,  $r = -0.621$ ,  $p = 9 \times 10^{-4}$ ).

(M-P) Analogous to (E-H) but for 30 days after DT injection at P30 for XBC (M, same cells as in I,  $r = -0.073$ ,  $p = 0.671$ ), BC5i/o (N, same cells as in J,  $r = -0.114$ ,  $p = 0.571$ ), BC6 (O, same cells as in K,  $r = -0.41$ ,  $p = 0.019$ ), and BC7 (P, same cells as in L,  $r = -0.198$ ,  $p = 0.344$ ). Throughout this figure, significant correlations are marked with solid lines.

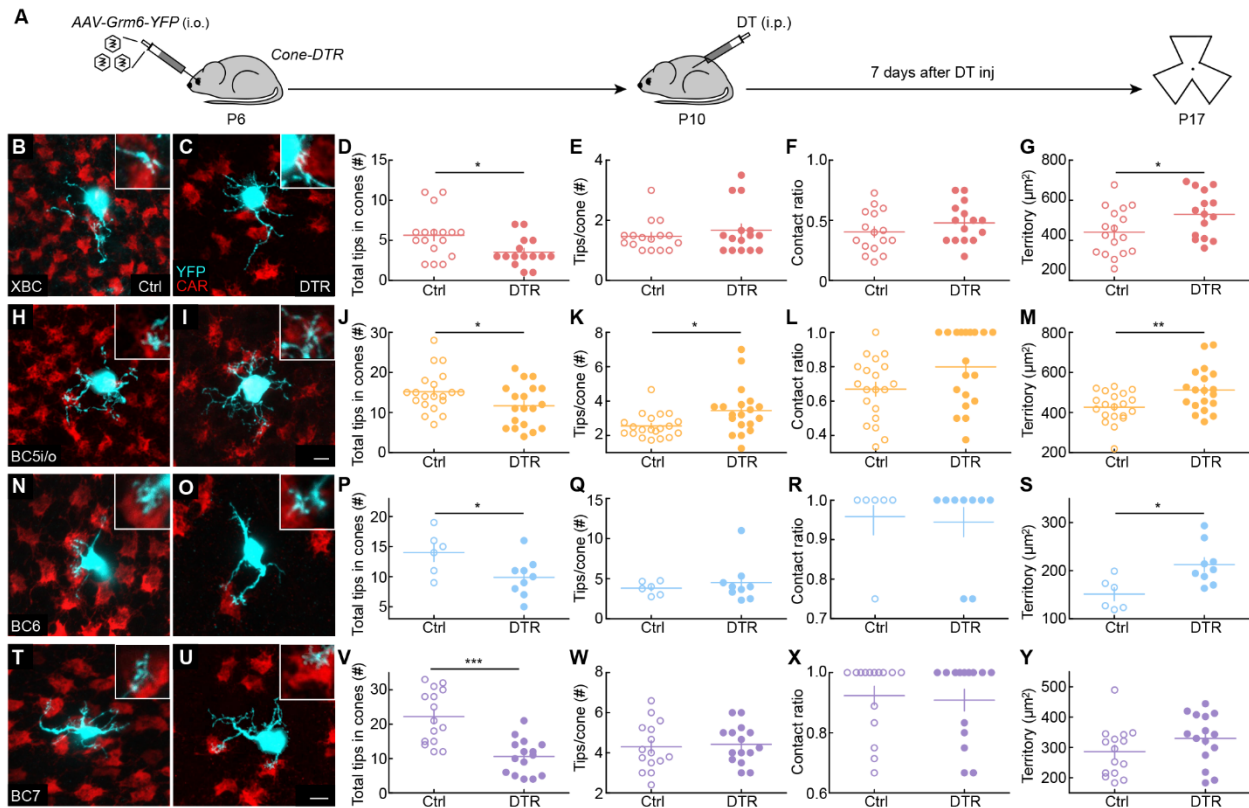

**Figure S5. Short-term dendritic remodeling after cone degeneration. Related to Figure 3.**

(A) Timeline of the experiment. Mice were intravitreally injected with *AAV-Grm6-YFP* at P6 to label ON bipolar cells and intraperitoneally injected with DT once at P10 to ablate cones. Seven days after DT injection (P17), retinas were dissected for analysis.

(B, C, H, I, N, O, T, U) Representative images of maximum intensity projections for dendrites (cyan) of XBC (B, C), BC5i/o (H, I), BC6 (N, O), and BC7 (T, U) cells in control (B, H, N, T) and *Cone-DTR* (C, I, O, U) retinas 7 days after DT injection at P10 with cone arrestin (CAR, red) staining. Scale bar = 5  $\mu\text{m}$ . Insets show higher magnification views of overlaps between dendritic tips and cones pedicles.

(D-G) Summary data for total numbers of tips in cones (D, control,  $5.65 \pm 0.69$ , *Cone-DTR*,  $3.53 \pm 0.47$ ,  $p = 0.019$  by Mann–Whitney U test), numbers of tips per cone (E, control,  $1.78 \pm 0.27$ ; *Cone-DTR*,  $1.67 \pm 0.21$ ,  $p = 0.76$  by Mann–Whitney U test), contact ratios (F, control,  $0.40 \pm 0.04$ , *Cone-DTR*,  $0.48 \pm 0.04$ ,  $p = 0.22$  by Mann–Whitney U test), and dendritic territories, control (G,  $441.47 \pm 28.27 \mu\text{m}^2$ , *Cone-DTR*,  $529.99 \pm 29.39 \mu\text{m}^2$ ,  $p = 0.035$  by Mann–Whitney U test) in control (open,  $n = 16$  cells from 4 mice) and *Cone-DTR* (filled,  $n = 15$  cells from 4 mice) XBCs.

(J-M) Summary data for total numbers of tips in cones (J, control,  $15.20 \pm 1.14$ , *Cone-DTR*,  $11.68 \pm 1.21$ ,  $p = 0.041$  Mann–Whitney U test), numbers of tips per cone (K, control,  $2.55 \pm 0.16$ , *Cone-DTR*,  $3.45 \pm 0.32$ ,  $p = 0.012$  Mann–Whitney U test), contact ratios (L, control,  $0.67 \pm 0.04$ , *Cone-DTR*,  $0.80 \pm 0.05$ ,  $p = 0.055$  by Mann–Whitney U test), and dendritic territories (M, control,  $426.64 \pm 17.14 \mu\text{m}^2$ , *Cone-DTR*,  $512.10 \pm 24.99 \mu\text{m}^2$ ,  $p = 0.007$  by Mann–Whitney U test) in control (open,  $n = 20$  cells from 4 mice) and *Cone-DTR* (filled,  $n = 19$  cells from 3 mice) BC5i/o cells.

(P-S) Summary data for total number of tips in cones (P, control,  $14.00 \pm 1.46$ , *Cone-DTR*,  $9.89 \pm 1.06$ ,  $p = 0.036$  by Mann–Whitney U test), numbers of tips per cone (Q, control,  $3.82 \pm 0.34$ , *Cone-DTR*,  $4.52 \pm 0.87$ ,  $p = 0.54$  by Mann–Whitney U test), contact ratios (R, control,  $0.96 \pm 0.04$ , *Cone-DTR*,  $0.94 \pm 0.04$ ,  $p = 0.94$  by Mann–Whitney U test), and dendritic territories (S, control,  $150.00 \pm 10.00 \mu\text{m}^2$ , *Cone-DTR*,  $200.00 \pm 10.00 \mu\text{m}^2$ ,  $p = 0.036$  by Mann–Whitney U test) in control (open,  $n = 10$  cells from 4 mice) and *Cone-DTR* (filled,  $n = 10$  cells from 4 mice) BC6 cells.

= 0.81 by Mann–Whitney U test), and dendritic territories (S, control,  $151.29 \pm 13.40 \mu\text{m}^2$ , *Cone-DTR*,  $212.59 \pm 14.41 \mu\text{m}^2$ ,  $p = 0.011$  by Mann–Whitney U test) in control (open,  $n = 6$  cells from 5 mice) and *Cone-DTR* (filled,  $n = 9$  cells from 3 mice) BC6 cells.

(V-Y) Summary data for total number of tips in cones (V, control,  $22.20 \pm 2.00$ , *Cone-DTR*,  $10.60 \pm 1.33$ ,  $p = 2.2 \times 10^{-4}$  by Mann–Whitney U test), numbers of tips per cone (W, control,  $4.30 \pm 0.31$ , *Cone-DTR*,  $4.42 \pm 0.25$ ,  $p = 0.76$  by Mann–Whitney U test), contact ratios (X, control,  $0.92 \pm 0.03$ , *Cone-DTR*,  $0.87 \pm 0.05$ ,  $p = 0.38$  by Mann–Whitney U test), and dendritic territories (Y, control,  $286.28 \pm 21.25 \mu\text{m}^2$ , *Cone-DTR*,  $329.85 \pm 21.52 \mu\text{m}^2$ ,  $p = 0.16$  by Mann–Whitney U test) in control (open,  $n = 15$  cells from 7 mice) and *Cone-DTR* (filled,  $n = 15$  cells from 8 mice) BC7 cells. Throughout this figure, \* indicates  $p < 0.05$ , \*\* indicates  $p < 0.01$ , and \*\*\* indicates  $p < 0.001$ .

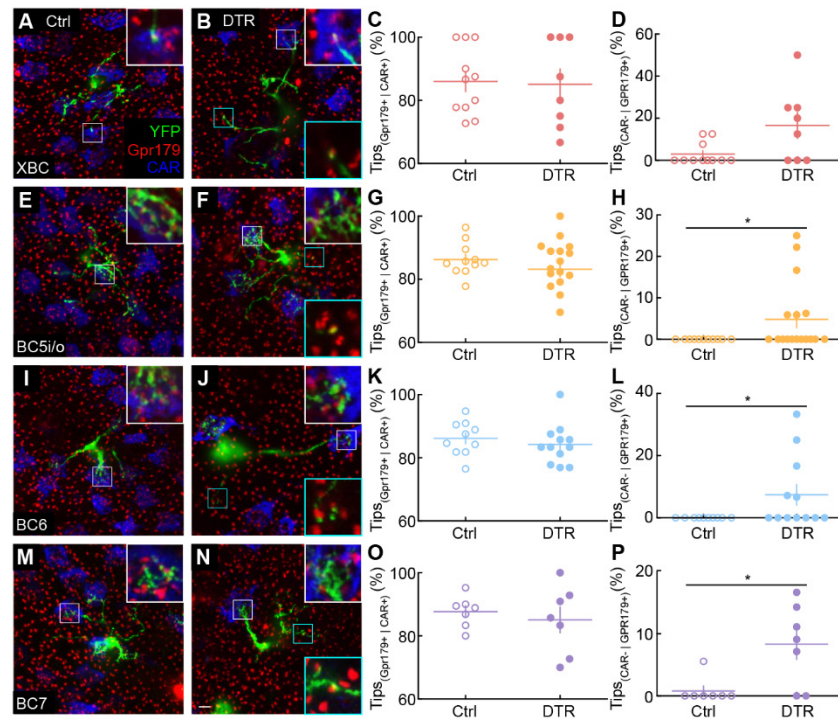

**Figure S6. Synaptic differentiation and rewiring of bipolar cell dendrites after cone degeneration in mature retinas. Related to Figure 4.**

(A, B, E, F, I, J, M, N) Representative super-resolution images of maximum intensity projections for dendrites (green) of XBC (A, B), BC5i/o (E, F), BC6 (I, J), and BC7 (M, N) in control (A, E, I, M) and *Cone-DTR* (B, F, J, N) retinas 30 days after DT injection at P10 stained for Gpr179 (red) and cone arrestin (CAR, blue). Scale bar = 5  $\mu\text{m}$ . Insets show higher magnification views of colocalization between dendrite tips and Gpr179 within (white boxes) and outside of (cyan boxes) cone pedicles.

(C, D) Summary data for synaptic differentiation (percentage of dendritic tips colocalized with Gpr179 in cone pedicles, C, control,  $85.98\% \pm 3.18\%$ , *Cone-DTR*,  $85.07\% \pm 4.87\%$ ,  $p = 0.85$  by Mann–Whitney U test) and putative rod inputs (percentage of dendritic tips colocalized with Gpr179 outside of cone pedicles, D, control,  $2.97\% \pm 1.58\%$ , *Cone-DTR*,  $17.37\% \pm 6.14\%$ ,  $p = 0.050$  by Mann–Whitney U test) in control (open,  $n = 11$  cells from 3 mice) and *Cone-DTR* (filled,  $n = 8$  cells from 3 mice) XBCs.

(G, H) Summary data for synaptic differentiation (G, control,  $86.26\% \pm 1.55\%$ , *Cone-DTR*,  $83.69\% \pm 2.39\%$ ,  $p = 0.45$  by Mann–Whitney U test) and putative rod inputs (H, control,  $0.00\% \pm 0.00\%$ , *Cone-DTR*,  $5.43\% \pm 2.02\%$ ,  $p = 0.033$  by Mann–Whitney U test) in control (open,  $n = 11$  cells from 3 mice) and *Cone-DTR* (filled,  $n = 17$  cells from 3 mice) BC5i/o cells.

(K, L) Summary data for synaptic differentiation (K, control,  $86.14\% \pm 1.71\%$ , *Cone-DTR*,  $84.22\% \pm 1.84\%$ ,  $p = 0.34$  by Mann–Whitney U test) and putative rod inputs (L, control,  $0.00\% \pm 0.00\%$ , *Cone-DTR*,  $7.40\% \pm 3.32\%$ ,  $p = 0.028$  by Mann–Whitney U test) in control (open,  $n = 9$  cells from 3 mice) and *Cone-DTR* (filled,  $n = 12$  cells from 3 mice) BC6 cells.

(O, P) Summary data for synaptic differentiation (O, control,  $87.68\% \pm 1.86\%$ , *Cone-DTR*,  $85.08\% \pm 4.08\%$ ,  $p = 0.83$  by Mann–Whitney U test) and putative rod inputs (P, control,  $0.79\% \pm 0.79\%$ , *Cone-DTR*,  $8.33\% \pm 2.46\%$ ,  $p = 0.021$  by Mann–Whitney U test) in control (open,  $n = 14$  cells from 3 mice) and *Cone-DTR* (filled,  $n = 8$  cells from 3 mice) BC7 cells. Throughout this figure, \* indicates  $p < 0.05$  and \*\* indicates  $p < 0.01$ .



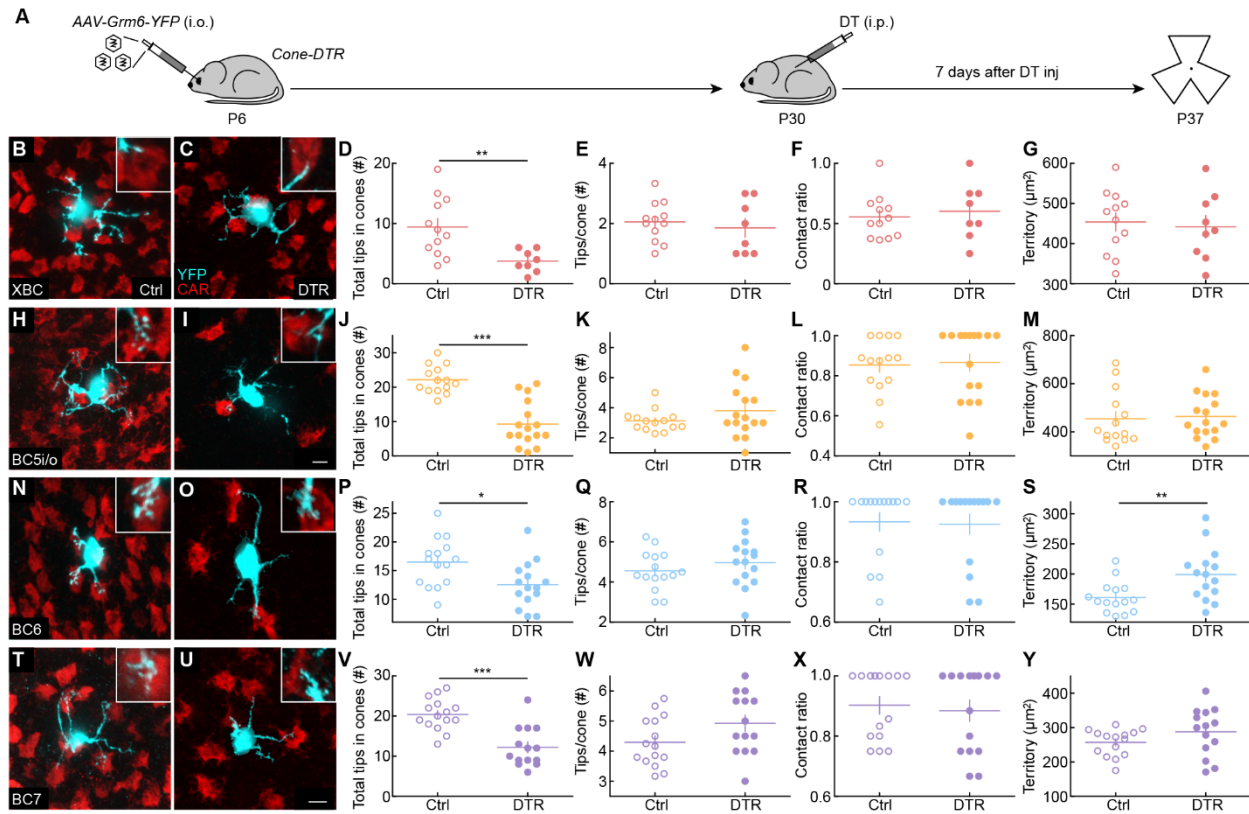

**Figure S7. Remodeling of bipolar cell dendrites 7 days after DT injection at P30. Related to Figure 4.**

(A) Timeline of the experiment. Mice were intravitreally injected with *AAV-Grm6-YFP* at P6 to label ON bipolar cells, and intraperitoneally injected with DT once at P30 to ablate cones. Seven days after DT injection (P37), retinas were dissected for analysis.

(B, C, H, I, N, O, T, U) Representative images of maximum intensity projections for dendrites (cyan) of XBC (B, C), BC5i/o (H, I), BC6 (N, O), and BC7 (T, U) cells in control (B, H, N, T) and Cone-DTR (C, I, O, U) retinas 30 days after DT injection at P10 with cone arrestin (CAR, red) staining. Scale bar = 5  $\mu\text{m}$ . Insets show higher magnification views of overlaps between dendritic tips and cones pedicles.

(D-G) Summary data for total numbers of tips in cones (D, control,  $9.42 \pm 1.42$ , *Cone-DTR*,  $3.75 \pm 0.65$ ,  $p = 0.006$  by Mann–Whitney U test), numbers of tips per cone (E, control,  $2.06 \pm 0.19$ , *Cone-DTR*,  $1.85 \pm 0.31$ ,  $p = 0.57$  by Mann–Whitney U test), contact ratios (F, control,  $0.55 \pm 0.05$ , *Cone-DTR*,  $0.60 \pm 0.08$ ,  $p = 0.63$  by Mann–Whitney U test), and dendritic territories (G, control,  $453.87 \pm 22.73 \mu\text{m}^2$ , *Cone-DTR*,  $441.97 \pm 27.68 \mu\text{m}^2$ ,  $p = 0.74$  by Mann–Whitney U test) in control (open,  $n = 12$  cells from 4 mice) and *Cone-DTR* (filled,  $n = 8$  cells from 4 mice) XBCs.

(J-M) Summary data for total numbers of tips in cones (J, control,  $22.14 \pm 1.06$ , *Cone-DTR*,  $9.25 \pm 1.63$ ,  $p = 5.5 \times 10^{-5}$  by Mann–Whitney U test), numbers of tips per cone (K, control,  $3.13 \pm 0.19$ , *Cone-DTR*,  $3.80 \pm 0.46$ ,  $p = 0.42$  by Mann–Whitney U test), contact ratios (L, control,  $0.85 \pm 0.04$ , *Cone-DTR*,  $0.87 \pm 0.04$ ,  $p = 0.82$  by Mann–Whitney U test), and dendritic territories (M, control,  $454.26 \pm 30.01 \mu\text{m}^2$ , *Cone-DTR*,  $463.76 \pm 22.19 \mu\text{m}^2$ ,  $p = 0.80$  by Mann–Whitney U test) in control (open,  $n = 14$  cells from 4 mice) and *Cone-DTR* (filled,  $n = 16$  cells from 3 mice) BC5i/o cells.

(P-S) Summary data for the total numbers of tips in cones (P, control,  $16.47 \pm 1.08$ , *Cone-DTR*,  $12.53 \pm 1.03$ ,  $p = 0.014$  by Mann–Whitney U test), numbers of tips per cone (Q, control,  $4.56 \pm 0.25$ , *Cone-DTR*,  $4.97 \pm 0.31$ ,  $p = 0.31$  by Mann–Whitney U test), contact ratios (R, control,  $0.93 \pm 0.03$ , *Cone-DTR*,  $0.93 \pm$

0.03,  $p = 0.87$  by Mann–Whitney U test), and dendritic territories (S, control,  $160.93 \pm 6.71 \mu\text{m}^2$ , *Cone-DTR*,  $199.14 \pm 11.17 \mu\text{m}^2$ ,  $p = 0.007$ , by Mann–Whitney U test) in control (open,  $n = 15$  cells from 4 mice) and *Cone-DTR* (filled,  $n = 15$  cells from 4 mice) BC6 cells.

(V-Y) Summary data for total numbers of tips in cones (V, control,  $20.40 \pm 1.01$ , *Cone-DTR*,  $12.21 \pm 1.32$ ,  $p = 3.45 \times 10^{-5}$  by Mann–Whitney U test), numbers of tips per cone (W, control,  $4.29 \pm 0.21$ , *Cone-DTR*,  $5.13 \pm 0.37$ ,  $p = 0.056$  by Mann–Whitney U test), contact ratios (X, control,  $0.90 \pm 0.03$ , *Cone-DTR*,  $0.88 \pm 0.04$ ,  $p = 0.68$  by Mann–Whitney U test), and dendritic territories (Y, control,  $256.82 \pm 10.01 \mu\text{m}^2$ , *Cone-DTR*,  $287.68 \pm 18.61 \mu\text{m}^2$ ,  $p = 0.12$  by Mann–Whitney U test) in control (open,  $n = 15$  cells from 5 mice) and *Cone-DTR* (filled,  $n = 14$  cells from 5 mice) BC7 cells. Throughout this figure, \* indicates  $p < 0.05$ , \*\* indicates  $p < 0.01$ , and \*\*\* indicates  $p < 0.001$ .

| Figure Panel | Parameter                            | Control (Mean ± SEM)           | Control (N)           | <i>Cone-DTR</i> (Mean ± SEM)  | <i>Cone-DTR</i> (N)   | p-value                |
|--------------|--------------------------------------|--------------------------------|-----------------------|-------------------------------|-----------------------|------------------------|
| Figure 1F    | Pedicle size (μm <sup>2</sup> )      | 30.63 ± 1.16                   | 22 cells from 3 mice  | 48.79 ± 1.82                  | 21 cells from 5 mice  | 1.5 x 10 <sup>-5</sup> |
| Figure 1L    | Pedicle size (μm <sup>2</sup> )      | 32.52 ± 1.05                   | 22 cells from 3 mice  | 52.25 ± 1.44                  | 21 cells from 4 mice  | 6.0 x 10 <sup>-5</sup> |
| Figure 1O    | Cells thickness (#)-ONL              | 10.83 ± 0.27                   | 12 slices from 3 mice | 10.92 ± 0.29                  | 12 slices from 3 mice | 0.85                   |
| Figure 1O    | Cells thickness (#)-INL              | 4.42 ± 0.15                    | 12 slices from 3 mice | 4.31 ± 0.12                   | 12 slices from 3 mice | 0.68                   |
| Figure 1U    | Cells thickness (#)-ONL              | 10.63 ± 0.16                   | 16 slices from 3 mice | 10.53 ± 0.16                  | 19 slices from 3 mice | 0.54                   |
| Figure 1U    | Cells thickness (#)-INL              | 4.31 ± 0.12                    | 16 slices from 3 mice | 4.37 ± 0.11                   | 19 slices from 3 mice | 0.73                   |
| Figure 1R    | Density (#/μm <sup>2</sup> )-M-cones | 11.10 ± 0.46 x 10 <sup>3</sup> | 9 fields from 3 mice  | 5.41 ± 0.24 x 10 <sup>3</sup> | 9 fields from 3 mice  | 1.3 x 10 <sup>-4</sup> |
| Figure 1R    | Density (#/μm <sup>2</sup> )-S-cones | 0.32 ± 0.03 x 10 <sup>3</sup>  | 9 fields from 3 mice  | 0.16 ± 0.01 x 10 <sup>3</sup> | 9 fields from 3 mice  | 4.5 x 10 <sup>-4</sup> |
| Figure 1R    | M-/S-cone ratio                      | 37.22 ± 3.07                   | 9 fields from 3 mice  | 34.27 ± 2.60                  | 9 fields from 3 mice  | 0.43                   |
| Figure 1X    | Density (#/μm <sup>2</sup> )-M-cones | 10.85 ± 0.18 x 10 <sup>3</sup> | 12 fields from 3 mice | 5.28 ± 0.19 x 10 <sup>3</sup> | 9 fields from 3 mice  | 1.2 x 10 <sup>-4</sup> |
| Figure 1X    | Density (#/μm <sup>2</sup> )-S-cones | 0.28 ± 0.02 x 10 <sup>3</sup>  | 12 fields from 3 mice | 0.14 ± 0.01 x 10 <sup>3</sup> | 9 fields from 3 mice  | 1.2 x 10 <sup>-4</sup> |
| Figure 1X    | M-/S-cone ratio                      | 40.29 ± 2.64                   | 12 fields from 3 mice | 39.37 ± 3.18                  | 9 fields from 3 mice  | 0.97                   |

**Table S1. Statistical data for Figure 1. Related to Figure 1.** All p-values are from Mann–Whitney U tests.

| Figure Panel | Parameter                            | Control (Mean $\pm$ SEM) | Control (N)          | <i>Cone-DTR</i> (Mean $\pm$ SEM) | <i>Cone-DTR</i> (N)  | p-value |
|--------------|--------------------------------------|--------------------------|----------------------|----------------------------------|----------------------|---------|
| Figure 2F    | Axonal territory ( $\mu\text{m}^2$ ) | 1072.99 $\pm$ 53.97      | 14 cells from 3 mice | 997.86 $\pm$ 59.67               | 15 cells from 4 mice | 0.32    |
| Figure 2M    | Axonal territory ( $\mu\text{m}^2$ ) | 396.07 $\pm$ 14.37       | 15 cells from 3 mice | 380.95 $\pm$ 19.54               | 19 cells from 4 mice | 0.63    |
| Figure 2T    | Axonal territory ( $\mu\text{m}^2$ ) | 168.68 $\pm$ 7.37        | 16 cells from 3 mice | 177.53 $\pm$ 9.18                | 16 cells from 3 mice | 0.34    |
| Figure 2A'   | Axonal territory ( $\mu\text{m}^2$ ) | 303.73 $\pm$ 14.26       | 13 cells from 3 mice | 285.44 $\pm$ 19.34               | 16 cells from 3 mice | 0.52    |
| Figure 2G    | Synapses (#)                         | 116.86 $\pm$ 3.98        | 14 cells from 3 mice | 120.43 $\pm$ 4.55                | 15 cells from 4 mice | 0.14    |
| Figure 2N    | Synapses (#)                         | 77.12 $\pm$ 2.84         | 15 cells from 3 mice | 81.24 $\pm$ 2.55                 | 19 cells from 4 mice | 0.22    |
| Figure 2U    | Synapses (#)                         | 71.53 $\pm$ 3.02         | 16 cells from 3 mice | 68.40 $\pm$ 3.27                 | 16 cells from 3 mice | 0.80    |
| Figure 2B'   | Synapses (#)                         | 115.58 $\pm$ 4.17        | 13 cells from 3 mice | 117.08 $\pm$ 5.24                | 16 cells from 3 mice | 0.40    |

**Table S2. Statistical data for Figure 2. Related to Figure 2 All p-values are from Mann–Whitney U tests.**

| Figure Panel | Parameter                               | Control (Mean $\pm$ SEM) | Control (N)          | <i>Cone-DTR</i> (Mean $\pm$ SEM) | <i>Cone-DTR</i> (N)  | p-value                |
|--------------|-----------------------------------------|--------------------------|----------------------|----------------------------------|----------------------|------------------------|
| Figure 3D    | Total tips in cones (#)                 | 8.55 $\pm$ 0.89          | 11 cells from 4 mice | 7.60 $\pm$ 0.72                  | 13 cells from 4 mice | 0.11                   |
| Figure 3J    | Total tips in cones (#)                 | 21.59 $\pm$ 0.99         | 17 cells from 4 mice | 19.14 $\pm$ 1.18                 | 22 cells from 4 mice | 0.13                   |
| Figure 3P    | Total tips in cones (#)                 | 15.83 $\pm$ 0.80         | 23 cells from 5 mice | 14.82 $\pm$ 0.92                 | 17 cells from 6 mice | 0.42                   |
| Figure 3V    | Total tips in cones (#)                 | 20.77 $\pm$ 1.29         | 13 cells from 8 mice | 16.00 $\pm$ 1.07                 | 16 cells from 7 mice | 0.008                  |
| Figure 3E    | Tips/cone (#)                           | 1.42 $\pm$ 0.08          | 11 cells from 4 mice | 2.03 $\pm$ 0.25                  | 13 cells from 4 mice | 0.024                  |
| Figure 3K    | Tips/cone (#)                           | 3.09 $\pm$ 0.19          | 17 cells from 4 mice | 5.81 $\pm$ 0.43                  | 22 cells from 4 mice | 8.8 x 10 <sup>-5</sup> |
| Figure 3Q    | Tips/cone (#)                           | 4.03 $\pm$ 0.17          | 23 cells from 5 mice | 4.72 $\pm$ 0.24                  | 17 cells from 6 mice | 0.022                  |
| Figure 3W    | Tips/cone (#)                           | 3.80 $\pm$ 0.20          | 13 cells from 8 mice | 5.36 $\pm$ 0.53                  | 16 cells from 7 mice | 0.018                  |
| Figure 3F    | Contact ratio                           | 0.63 $\pm$ 0.02          | 11 cells from 4 mice | 0.77 $\pm$ 0.04                  | 13 cells from 4 mice | 0.006                  |
| Figure 3L    | Contact ratio                           | 0.82 $\pm$ 0.04          | 17 cells from 4 mice | 0.97 $\pm$ 0.02                  | 22 cells from 4 mice | 6.9 x 10 <sup>-5</sup> |
| Figure 3R    | Contact ratio                           | 0.95 $\pm$ 0.03          | 23 cells from 5 mice | 0.96 $\pm$ 0.03                  | 17 cells from 6 mice | 0.78                   |
| Figure 3X    | Contact ratio                           | 0.91 $\pm$ 0.03          | 13 cells from 8 mice | 0.98 $\pm$ 0.02                  | 16 cells from 7 mice | 0.085                  |
| Figure 3G    | Dendritic territory ( $\mu\text{m}^2$ ) | 436.20 $\pm$ 30.25       | 11 cells from 4 mice | 440.85 $\pm$ 25.54               | 13 cells from 4 mice | 0.93                   |
| Figure 3M    | Dendritic territory ( $\mu\text{m}^2$ ) | 440.56 $\pm$ 20.58       | 17 cells from 4 mice | 445.71 $\pm$ 14.76               | 22 cells from 4 mice | 0.84                   |
| Figure 3S    | Dendritic territory ( $\mu\text{m}^2$ ) | 153.91 $\pm$ 6.90        | 23 cells from 5 mice | 198.26 $\pm$ 12.07               | 17 cells from 6 mice | 0.009                  |
| Figure 3Y    | Dendritic territory ( $\mu\text{m}^2$ ) | 232.82 $\pm$ 11.55       | 13 cells from 8 mice | 317.34 $\pm$ 26.84               | 16 cells from 7 mice | 0.013                  |

**Table S3. Statistical data for Figure 3. Related to Figure 3. All p-values are from Mann–Whitney U tests.**

| Figure Panel | Parameter                               | Control (Mean $\pm$ SEM) | Control (N)          | <i>Cone-DTR</i> (Mean $\pm$ SEM) | <i>Cone-DTR</i> (N)  | p-value                |
|--------------|-----------------------------------------|--------------------------|----------------------|----------------------------------|----------------------|------------------------|
| Figure 4D    | Total tips in cones (#)                 | 9.14 $\pm$ 0.84          | 17 cells from 3 mice | 8.25 $\pm$ 1.06                  | 20 cells from 5 mice | 0.54                   |
| Figure 4J    | Total tips in cones (#)                 | 21.86 $\pm$ 1.09         | 14 cells from 4 mice | 15.19 $\pm$ 1.03                 | 16 cells from 4 mice | 1.3 x 10 <sup>-4</sup> |
| Figure 4P    | Total tips in cones (#)                 | 16.37 $\pm$ 0.87         | 19 cells from 5 mice | 12.93 $\pm$ 1.05                 | 18 cells from 5 mice | 0.016                  |
| Figure 4V    | Total tips in cones (#)                 | 22.00 $\pm$ 1.20         | 14 cells from 8 mice | 16.47 $\pm$ 1.23                 | 15 cells from 7 mice | 0.003                  |
| Figure 4E    | Tips/cone (#)                           | 2.15 $\pm$ 0.13          | 17 cells from 3 mice | 2.90 $\pm$ 0.27                  | 20 cells from 5 mice | 0.025                  |
| Figure 4K    | Tips/cone (#)                           | 3.67 $\pm$ 0.19          | 14 cells from 4 mice | 4.70 $\pm$ 0.21                  | 16 cells from 4 mice | 0.002                  |
| Figure 4Q    | Tips/cone (#)                           | 4.61 $\pm$ 0.22          | 19 cells from 5 mice | 5.60 $\pm$ 0.38                  | 18 cells from 5 mice | 0.023                  |
| Figure 4W    | Tips/cone (#)                           | 4.04 $\pm$ 0.33          | 14 cells from 8 mice | 3.56 $\pm$ 0.41                  | 15 cells from 7 mice | 0.004                  |
| Figure 4F    | Contact ratio                           | 0.51 $\pm$ 0.05          | 17 cells from 3 mice | 0.76 $\pm$ 0.05                  | 20 cells from 5 mice | 0.002                  |
| Figure 4L    | Contact ratio                           | 0.76 $\pm$ 0.02          | 14 cells from 4 mice | 0.91 $\pm$ 0.03                  | 16 cells from 4 mice | 0.003                  |
| Figure 4R    | Contact ratio                           | 0.94 $\pm$ 0.03          | 19 cells from 5 mice | 0.92 $\pm$ 0.04                  | 18 cells from 5 mice | 0.69                   |
| Figure 4X    | Contact ratio                           | 0.91 $\pm$ 0.03          | 14 cells from 8 mice | 0.89 $\pm$ 0.04                  | 15 cells from 7 mice | 0.85                   |
| Figure 4G    | Dendritic territory ( $\mu\text{m}^2$ ) | 454.31 $\pm$ 27.68       | 17 cells from 3 mice | 429.01 $\pm$ 28.38               | 20 cells from 5 mice | 0.53                   |
| Figure 4M    | Dendritic territory ( $\mu\text{m}^2$ ) | 453.59 $\pm$ 17.37       | 14 cells from 4 mice | 450.12 $\pm$ 26.49               | 16 cells from 4 mice | 0.98                   |
| Figure 4S    | Dendritic territory ( $\mu\text{m}^2$ ) | 158.74 $\pm$ 11.50       | 19 cells from 5 mice | 244.03 $\pm$ 20.38               | 18 cells from 5 mice | 0.003                  |
| Figure 4Y    | Dendritic territory ( $\mu\text{m}^2$ ) | 277.64 $\pm$ 16.90       | 14 cells from 8 mice | 285.38 $\pm$ 27.46               | 15 cells from 7 mice | 0.86                   |

**Table S4. Statistical data for Figure 4. Related to Figure 4. All p-values are from Mann–Whitney U tests.**

| Figure Panel | Parameter                                       | Control (N) | <i>Cone-DTR</i> (N) | p-value |
|--------------|-------------------------------------------------|-------------|---------------------|---------|
| Figure 6B    | Amplitude ( $\mu$ V)-Dark-adapted flash a-wave  | 5 mice      | 6 mice              | 0.22    |
| Figure 6B    | Amplitude ( $\mu$ V)-Dark-adapted flash b-wave  | 5 mice      | 6 mice              | 0.19    |
| Figure 6H    | Amplitude ( $\mu$ V)-Dark-adapted flash a-wave  | 6 mice      | 8 mice              | 0.41    |
| Figure 6H    | Amplitude ( $\mu$ V)-Dark-adapted flash b-wave  | 6 mice      | 8 mice              | 0.19    |
| Figure 6D    | Amplitude ( $\mu$ V)-Light-adapted flash b-wave | 5 mice      | 6 mice              | 0.79    |
| Figure 6J    | Amplitude ( $\mu$ V)-Light-adapted flash b-wave | 6 mice      | 8 mice              | 0.01    |
| Figure 6F    | Amplitude ( $\mu$ V)-Light-adapted flash        | 9 mice      | 6 mice              | 0.17    |
| Figure 6L    | Amplitude ( $\mu$ V)-Light-adapted flash        | 6 mice      | 8 mice              | 0.003   |

**Table S5. Statistical data for Figure 6. Related to Figure 6.** All p-values are from bootstrapping.

| Figure Panel | Parameter                    | Control<br>(Mean $\pm$ SEM) | Control (N) | <i>Cone-DTR</i><br>(Mean $\pm$ SEM) | <i>Cone-DTR</i> (N) | p-value |
|--------------|------------------------------|-----------------------------|-------------|-------------------------------------|---------------------|---------|
| Figure 7C    | ETMs (# 180s <sup>-1</sup> ) | 10.20 $\pm$ 0.58            | 5 mice      | 9.83 $\pm$ 0.70                     | 6 mice              | 0.85    |
| Figure 7G    | ETMs (# 180s <sup>-1</sup> ) | 10.67 $\pm$ 0.80            | 6 mice      | 8.14 $\pm$ 0.60                     | 7 mice              | 0.029   |
| Figure 7E    | Shallow (%)                  | 80.00 $\pm$ 3.94            | 10 mice     | 73.33 $\pm$ 2.11                    | 6 mice              | 0.24    |
| Figure 7H    | Shallow (%)                  | 81.36 $\pm$ 4.36            | 7 mice      | 56.25 $\pm$ 4.60                    | 8 mice              | 0.003   |

**Table S6. Statistical data for Figure 7. Related to Figure 7.** All p-values are from Mann–Whitney U tests.
